# Supplementary material
Source: bioRxiv or medRxiv preprint supplement (https://www.medrxiv.org/highwire/filestream/69748/field_highwire_adjunct_files/0/19007906-1.pdf)
Supplement: Supplementary file [file 19007906-1.pdf]

# Mild Traumatic Brain Injury Disrupts Functional Dynamic Attractors of Healthy Mental States

<sup>1</sup>Victor M. Vergara, PhD, <sup>2</sup>Harm J. van der Horn, MD, PhD, <sup>3</sup>Andrew R. Mayer, PhD, <sup>1</sup>Flor A. Espinoza, PhD, <sup>2</sup>Joukje van der Naalt, MD, PhD <sup>1</sup>Vince D Calhoun, PhD

<sup>1</sup>*Tri-institutional center for Translational Research in Neuroimaging and Data Science (TRenDS), [Georgia State University, Georgia Institute of Technology, Emory University], 25 Park Place, Atlanta GA 30303*

<sup>2</sup>*Dept of Neurology, University of Groningen, University Medical Center Groningen, The Netherlands*

<sup>3</sup>*The Mind Research Network and Lovelace Biomedical and Environmental Research Institute, 1101 Yale Blvd. NE, Albuquerque, New Mexico, 87106*

## Discovery Cohort

### Subjects

The sample cohort has been utilized previously to study different sets of brain data modalities (Ling *et al.*, 2012; Mayer *et al.*, 2015b) including analyses of static and dynamic connectivity (Mayer *et al.*, 2015a; Vergara *et al.*, 2017). In this cohort, a total of 48 mTBI patients were matched by sex and age (up to 3 years, mean age  $27.3 \pm 9.0$  years) with 48 healthy controls (HC) participants. Patients were recruited from local emergency rooms with inclusion criteria based on the American Congress of Rehabilitation Medicine (ACRM). Subjects classified as mTBI had a Glasgow Coma Scale (Teasdale and Jennett, 1974) between 13 and 15, a maximum of 30 minutes loss of consciousness (if present), and a maximum of 24 hours post-traumatic amnesia (if present). Subjects were excluded if there was a history of neurological disease, major psychiatric disturbance, and additional closed head injuries with more than 5 minutes of lost consciousness, additional closed head injury within the past year, learning disorder, ADHD, or a recent history of substance abuse/dependence including alcohol. All participants provided informed consent according to the Declaration of Helsinki and the institutional guidelines at the University of New Mexico.

### Imaging Protocol

All images were collected on a 3 Tesla Siemens TIM Trio scanner. Each participant completed a 5-minute resting state run using a single-shot, gradient-echo echo planar pulse sequence (TR = 2000 ms; TE = 29 ms; flip angle =  $75^\circ$ ; FOV = 240 mm; matrix size = 64 x 64). Foam padding and paper tape were used to restrict motion within the scanner. Thirty-three contiguous, axial 4.55-mm thick slices were selected to provide whole-brain coverage (voxel size: 3.75 x 3.75 x 4.55 mm) during scanning. The first five images were eliminated to account for  $T_1$  equilibrium effects; 145 images were selected for further analysis. Presentation software (Neurobehavioral Systems) was used for stimulus presentation and synchronization of stimuli with the MRI scanners. Subjects were instructed to passively stare at a foveally presented fixation cross (visual angle =  $1.02^\circ$ ) for approximately 5 minutes and to keep head movement to a minimum.

### Data Pre-Processing

Preprocessing and other analyses were similar to our previous publication (Vergara *et al.*, 2017) and are therefore only briefly presented here. Resting state fMRI data were pre-

VM Vergara, HJ van der Horn, A Mayer, FA Espinoza, J van der Naalt, VD Calhoun processed using statistical parametric mapping (Friston, 2003) (SPM v5: <http://www.fil.ion.ucl.ac.uk/spm>) including slice-timing correction, realignment, co-registration, and spatial normalization and then transformed to the Montreal Neurological Institute standard space. For despiking we utilized the command 3dDespike from the software Analysis of Functional NeuroImages (AFNI v17.1.03). The time courses were orthogonalized with respect to the following: i) linear, quadratic, and cubic trends; ii) the six realignment parameters; and iii) realignment parameters derivatives. A full width at half maximum Gaussian kernel of 6 mm was then used for smoothing. Data from all subjects were subject to a group ICA (gICA) (Calhoun *et al.*, 2001; Calhoun and Adali, 2012) using the GIFT software (GIFT v4: <http://mialab.mrn.org/software/gift/>) to obtain a set of functionally independent components. The number of components was determined to be 70 using a modified version of ICASSO (Himberg *et al.*, 2004; Ma *et al.*, 2011). Artifactual components were previously detected and discarded as described in (Vergara *et al.*, 2018). A total of 48 noise free components referred to as resting state networks (RSNs) were used in this work. Spatial maps and MNI coordinates for the selected RSNs are displayed in Supplementary Figure 1. These RSNs were organized in nine functional domains: subcortical (SBC), cerebellum (CER), auditory (AUD), sensorimotor (SEN), visual (VIS), salience (SAL), default mode network (DMN), executive control (ECN) and language (LAN).

### **Dynamic FNCs, Derivatives and Transitions**

A dFNC analysis was performed using the dynamic FNC Toolbox (dFNC v1.0a) available in the GIFT package. A fifth-order Butterworth band-pass filter [0.01 0.15] Hz was applied to the time courses extracted from gICA. Following recent advances in dynamic connectivity, we applied the average sliding window correlation (ASWC) method (Vergara *et al.*, 2019) that proved to reduce the amplitude of artifact fluctuations not accounted for in the standard sliding window correlation (SWC) approach. Reducing artifact fluctuations is critical in our analysis because they can strongly affect the estimation of derivatives. We employed a sliding window size of 22 TRs (44 seconds) of a rectangular window convolved with a Gaussian ( $\sigma = 3$  TRs) moving one step at a time. A total of 98 time-windowed were created for each subject and 1128 ( $48 \times 47/2$ ) correlations between RSNs were estimated at each time step. One difference from SWC is that ASWC requires a second step consisting on applying a moving average filter with averaging size of 25 TRs (50 seconds). Lastly, sequences of ASWC with 98 time steps were obtained for all subjects. Temporal derivatives were estimated using the central difference applied to the estimated sequences of ASWC. Because the lack of samples on the extremes, the first ASWC derivative was obtained using forward difference and the last one using backward difference (Espinoza *et al.*, 2018). Estimated time varying correlations (ASWC) and their derivatives were then concatenated to form a vector of 2256 values at each time point.

The next step in the analysis was to cluster the ASWC data and extract patterns of connectivity formed by whole brain FNC correlations and their derivatives. Since there are dynamic range differences between correlations and their derivatives, we normalized the 1128 derivatives to exhibit the same variance as the correlations within a subject. This step was only necessary for clustering and was excluded from the rest of the analysis. Clustering was performed using the k-means algorithm. A k-mean cluster is a set of whole brain ASWC grouped according to this data driven clustering method.

Transition probabilities  $P\{X_{next} | X_{next} \neq X_{prev}\}$  between clusters were estimated using the membership functions. At the moment of a transition, where membership function  $X$  change value indicating a change in cluster membership,  $X_{prev}$  represents the cluster

VM Vergara, HJ van der Horn, A Mayer, FA Espinoza, J van der Naalt, VD Calhoun membership before the transition and  $X_{next}$  the membership after the transition. Each transition last for one TR. The number of transition instances  $X_{next} \neq X_{prev}$  is quite small when compared to the number of no-transitions  $X_{next} = X_{prev}$ . In addition, the TR has a strong impact on the number of no-transition instances since the shorter the TR the larger is the number of time steps without a transition. On the other hand, transition probabilities are always detected within the 2 TRs where the membership change occurs. Thus, there is no reason to suspect the TR will influence this estimation. However, the available dFNC estimations (98 per subject) were not enough to allow for all possible transitions to occur and very imprecise probability estimations would have been made. Instead, we analyzed the data on a group-wise manner. Transition probabilities were estimated using the frequency method using 4704 dFNCs (98 time steps multiplied by 48 subjects) for the HC group. The same was performed for the mTBI group. No transition instances  $X_{next} = X_{prev}$  were analyzed separately by estimating the membership probability  $P\{X_{next}|X_{next} = X_{prev}\}$ . Estimations of  $P\{X_{next}|X_{next} = X_{prev}\}$  and prior probabilities  $P\{X\}$  were obtained in the same group-wise procedure previously described. The prior probabilities  $P\{X\}$  are estimates from the bare frequency of a membership within one of the sample groups HC or mTBI.

### **Differences between HC and mTBI**

The HC and mTBI groups were defined by the binary variable diagnoses (HC=0 or mTBI=1). Group differences were tested using a linear regression model. The independent variables were sex, age, education, an estimate of premorbid intelligence, and diagnosis. The dependent variables were the clustering measures dwell time, occupancy rate, and each of the 2256 values (ASWCs and derivatives) from each cluster and subject.

As explained before, probabilities assessments are based on frequency using wither all mTBI or all HC subjects. Thus, we don't have subject-wise data to apply linear regression models. Instead, we utilized a bootstrap method to determine probability difference significance between HC and mTBI. On each iteration, data from a random selection of HC and mTBI was performed with replacement within the respective sample group. The target probabilities, one from HC and one fomr mTBI, were estimated and the probability difference  $T = P_{mTBI} - P_{HC}$  calculated. The distribution of T was measured using 10,000 iterations. The significance was obtained using the one-side p-value from the distribution of T. The bootstrapped test was performed to find differences in membership probability  $P\{X\}$ , the no-transition probability  $P\{X_{next}|X_{next} = X_{prev}\}$  and the probability of transition  $P\{X_{next}|X_{next} \neq X_{prev}\}$ .

## **Replication Cohort**

### **Subjects**

This fMRI study was part of a multi-center cohort study (UPFRONT study) on outcome after mTBI conducted between January 2013 and January 2016 in three level 1 trauma centers in the Netherlands (University Medical Center Groningen [UMCG], St. Elisabeth Hospital Tilburg, and the Medical Spectrum Twente) (van der Naalt *et al.*, 2017). Fifty-four patients with mTBI were recruited (mean age 37 (19-64), 67% male, 87% right-handed, median education level of 6 years (range: 2–7) according to the Verhage classification system (Verhage, 1964)); 49 of these patients returned for follow-up scanning. Mild TBI was diagnosed based on the aforementioned ACRM criteria. Exclusion criteria were: age <18 and >65 years, abnormalities on admission CT scan (i.e., uncomplicated

VM Vergara, HJ van der Horn, A Mayer, FA Espinoza, J van der Naalt, VD Calhoun (mTBI), major neurological or psychiatric comorbidity, admission for prior TBI, drug or alcohol abuse, mental retardation, and contraindications for MRI (implanted ferromagnetic devices or objects, pregnancy, or claustrophobia). In addition, a group of 20 healthy controls (HC) was recruited, which was matched to the total mTBI group with respect to age, sex, education level, and handedness. This group consisted of 70% male and 85% right handed subjects, with a mean of 36 years (range: 18–61), and a median education level of 6 (5-7). Data collection protocol was approved by the local Medical Ethics Committee of the UMCG; written informed consent was obtained from all participants. All procedures were performed according to the declaration of Helsinki.

### **MRI acquisition**

Patients underwent scanning at approximately 4 weeks (first visit) and 3 months (follow-up visit) post-injury. A 3.0 T Philips Intera MRI scanner (Phillips Medical Systems, Best, The Netherlands) equipped with a 32 channel SENSE head coil was used for image acquisition. A high resolution transversal T1-weighted sequence image was made for anatomical reference (repetition time [TR] 9 ms; echo time [TE] 3.5 ms; flip angle 8 degrees; field of view [FOV]  $256 \times 232 \times 170$  mm; reconstructed voxel size  $1 \times 1 \times 1$  mm). For resting-state imaging, 300 T2\*-weighted echo planar imaging volumes were acquired with slices aligned in the anterior commissure (AC)-posterior commissure (PC) plane and recorded in descending order (TR 2000 ms; TE 20 ms; FOV  $224 \times 224 \times 136.5$  mm; reconstructed voxel size  $3.5 \times 3.5 \times 3.5$  mm). Participants were instructed to close their eyes and to stay awake (duration: 10 min).

### **fMRI preprocessing**

Statistical Parametric Mapping (SPM12 Wellcome Department, University College London, London, England) implemented in Matlab (version R2017b; MathWorks, Natick, MA) was used for preprocessing, which consisted of slice timing correction, image realignment to the first functional image, co-registration of functional images with individual participants' T1-weighted images, normalization (isotropic voxels of  $3 \times 3 \times 3$  mm) to the Montreal Neurological Institute [MNI] echo-planar-imaging (EPI)-template and smoothing (6 mm full-width at half maximum [FWHM] Gaussian kernel). The first 5 volumes were discarded before ICA to correct for T1-equilibrium effects.

### **References**

- Calhoun V, Adali T, Pearlson G, Pekar J. A method for making group inferences from functional MRI data using independent component analysis. *Human brain mapping* 2001; 14(3): 140-51.
- Calhoun VD, Adali T. Multisubject independent component analysis of fMRI: a decade of intrinsic networks, default mode, and neurodiagnostic discovery. *IEEE Rev Biomed Eng* 2012; 5: 60-73.
- Espinoza F, Damaraju E, Vergara V, Henke K, Turner J, Calhoun V. Characterizing whole brain temporal variation of functional connectivity via zero and first order derivatives of sliding window correlations. *Sixth Biennial Conference on Resting State and Brain Connectivity*; 2018.
- Friston KJ. Statistical parametric mapping. *Neuroscience Databases*: Springer; 2003. p. 237-50.
- Himberg J, Hyvärinen A, Esposito F. Validating the independent components of neuroimaging time series via clustering and visualization. *Neuroimage* 2004; 22(3): 1214-22.
- Ling JM, Peña A, Yeo RA, Merideth FL, Klimaj S, Gasparovic C, *et al.* Biomarkers of increased diffusion anisotropy in semi-acute mild traumatic brain injury: a longitudinal perspective. *Brain* 2012; 135(4): 1281-92.

- VM Vergara, HJ van der Horn, A Mayer, FA Espinoza, J van der Naalt, VD Calhoun, Ma S, Correa NM, Li X-L, Eichele T, Calhoun VD, Adali T. Automatic identification of functional clusters in fMRI data using spatial dependence. *Biomedical Engineering, IEEE Transactions on* 2011; 58(12): 3406-17.
- Mayer AR, Bellgowan PS, Hanlon FM. Functional magnetic resonance imaging of mild traumatic brain injury. *Neuroscience & Biobehavioral Reviews* 2015a; 49: 8-18.
- Mayer AR, Ling JM, Allen EA, Klimaj SD, Yeo RA, Hanlon FM. Static and Dynamic Intrinsic Connectivity following Mild Traumatic Brain Injury. *J Neurotrauma* 2015b; 32(14): 1046-55.
- Teasdale G, Jennett B. Assessment of Coma and Impaired Consciousness. *The Lancet* 1974; 304(7872): 81-4.
- van der Naalt J, Timmerman ME, de Koning ME, van der Horn HJ, Scheenen ME, Jacobs B, *et al.* Early predictors of outcome after mild traumatic brain injury (UPFRONT): an observational cohort study. *The Lancet Neurology* 2017; 16(7): 532-40.
- Vergara VM, Abrol A, Calhoun VD. An average sliding window correlation method for dynamic functional connectivity. *Hum Brain Mapp* 2019.
- Vergara VM, Mayer A, Kiehl KA, Calhoun VD. Dynamic functional network connectivity discriminates mild traumatic brain injury through machine learning. *NeuroImage: Clinical* 2018.
- Vergara VM, Mayer AR, Damaraju E, Kiehl KA, Calhoun V. Detection of Mild Traumatic Brain Injury by Machine Learning Classification Using Resting State Functional Network Connectivity and Fractional Anisotropy. *J Neurotrauma* 2017; 34(5): 1045-53.
- Verhage F. *Intelligence and Age: Study with Dutch People Aged 12-77*. Assen: Van Gorcum 1964.
